# Supplementary material for: Alternative splicing of coq-2 controls the levels of rhodoquinone in animals
Source: eLife. 2020 Aug 3;9:e56376. doi: 10.7554/eLife.56376 (PMC7434440; doi:10.7554/eLife.56376)
Supplement: Supplementary file 3. [file elife-56376-supp3.xlsx]

## Sheet: Sheet1
SUPPLEMENTARY FILE 3. Genomic coordinates of known and predicted mutually exclusive coq-2 a/e exons
Species	Gene	Exon-type	Chromosome/Scaffold	Location	Strand	Annotated	Length	Version	Phylum	RNA-seq study analyzed
Trichinella spiralis	T01_13908	e	scaffold26s	87773-87909	+	Novel splice site	137	WBPS14	Nematoda	SRP014316
Trichinella spiralis	T01_13908	a	scaffold26s	89164-89297	+	Yes	134	WBPS14	Nematoda	SRP014316
Trichuris muris	WBGene00293864 (TMUE_2000006714)	e	TMUE_LG2	12613169-12613308	+	Yes	140	WBPS14	Nematoda	ERP002000
Trichuris muris	WBGene00293864 (TMUE_2000006714)	a	TMUE_LG2	12613537-12613670	+	Novel exon	134	WBPS14	Nematoda	ERP002000
Ascaris suum	AgB05_g070	e	AgB05	1194260-1194390	+	Yes	131	WBPS14	Nematoda	SRP005511,SRP013573
Ascaris suum	AgB05_g070	a	AgB05	1198569-1198702	+	Yes	134	WBPS14	Nematoda	SRP005511,SRP013573
Brugia malayi	WBGene00255591 (Bm16942)	e	Bm_v4_Chr1_scaffold_001	6349844-6349974	-	Yes	131	WBPS14	Nematoda	ERP000948
Brugia malayi	WBGene00255591 (Bm16942)	a	Bm_v4_Chr1_scaffold_001	6348862-6348992	-	Yes	131	WBPS14	Nematoda	ERP000948
Strongyloides ratti	WBGene00260212 (SRAE_2000002300)	e	SRAE_chr2	66293-66432	-	Novel splice site	140	WBPS14	Nematoda	ERP002187
Strongyloides ratti	WBGene00260212 (SRAE_2000002300)	a	SRAE_chr2	66040-66173	-	Yes	134	WBPS14	Nematoda	ERP002187
Strongyloides stercoralis	SSTP_0000143000	e	SSTP_scaffold0000001	1888297-1888436	+	Yes	140	WBPS14	Nematoda	ERP001556
Strongyloides stercoralis	SSTP_0000143000	a	SSTP_scaffold0000001	1888554-1888687	+	Novel exon	134	WBPS14	Nematoda	ERP001556
Strongyloides papillosus	SPAL_0000295400	e	SPAL_scaffold0000002	401438-401577	-	Novel splice site	140	WBPS14	Nematoda	ERP016188
Strongyloides papillosus	SPAL_0000295400	a	SPAL_scaffold0000002	401165-401298	-	Yes	134	WBPS14	Nematoda	ERP016188
Ancylostoma ceylanicum	maker-ANCCEYDFT_Contig505-augustus-gene-0.53	e	ANCCEYDFT_Contig505	81986-82119	-	Novel exon	134	WBPS14	Nematoda	SRP058598
Ancylostoma ceylanicum	maker-ANCCEYDFT_Contig505-augustus-gene-0.53	a	ANCCEYDFT_Contig505	80277-80407	-	Novel splice site	131	WBPS14	Nematoda	SRP058598
Caenorhabditis elegans	WBGene00000762	e	III	6937600-6937733	+	Yes	134	WBPS14	Nematoda
Caenorhabditis elegans	WBGene00000762	a	III	6938412-6938545	+	Yes	134	WBPS14	Nematoda
Haemonchus contortus	HCON_00082210	e	hcontortus_chr3_Celeg_TT_arrow_pilon	24022222-24022355	-	Novel exon	134	WBPS14	Nematoda	ERP002173,SRP026668
Haemonchus contortus	HCON_00082210	a	hcontortus_chr3_Celeg_TT_arrow_pilon	24017677-24017807	-	Yes	131	WBPS14	Nematoda	ERP002173,SRP026668
Nippostrongylus brasiliensis	NBR_0001085001	e	NBR_scaffold0000650	60610-60743	-	Novel splice site	134	WBPS14	Nematoda	ERP023010
Nippostrongylus brasiliensis	NBR_0001085001	a	NBR_scaffold0000650	58731-58864	-	Yes	134	WBPS14	Nematoda	ERP023010
Fasciola hepatica	maker-scaffold10x_13_pilon-augustus-gene-0.26	e	scaffold10x_13_pilon	2309470-2309603	+	Yes	134	WBPS14	Platyhelminthes	ERP006566
Fasciola hepatica	maker-scaffold10x_13_pilon-augustus-gene-0.26	a	scaffold10x_13_pilon	2309839-2309972	+	Yes	134	WBPS14	Platyhelminthes	ERP006566
Schistosoma mansoni	Smp_347140	e	SM_V7_4	21491638-21491771	+	Yes	134	WBPS14	Platyhelminthes	ERP000427
Schistosoma mansoni	Smp_347140	a	SM_V7_4	21491970-21492103	+	Yes	134	WBPS14	Platyhelminthes	ERP000427
Schmidtea mediterranea	SMESG000018280	e	dd_Smes_g4_166	691338-691471	+	Yes	134	WBPS14	Platyhelminthes
Schmidtea mediterranea	SMESG000018280	a	dd_Smes_g4_166	696985-697118	+	Yes	134	WBPS14	Platyhelminthes
Crassotrea gigas	CGI_10026525	e	scaffold156	818738-818868	-	Novel splice site	131	Ensembl Metazoa 45	Mollusca	SRP014559
Crassotrea gigas	CGI_10026525	a	scaffold156	817079-817212	-	Yes	134	Ensembl Metazoa 45	Mollusca	SRP014559
Biomphalaria glabrata	BGLB019291	e	LG17_random_Scaffold1016	30223-30353	+	Yes	131	Ensembl Metazoa 46	Mollusca	SRP067658
Biomphalaria glabrata	BGLB019291	a	LG17_random_Scaffold1016	31998-32131	+	Yes	134	Ensembl Metazoa 46	Mollusca	SRP067658
Capitella teleta	CapteG154146	e	CAPTEscaffold_83	114793-114923	+	Novel exon	131	Ensembl Metazoa 45	Annelida	PRJNA379706
Capitella teleta	CapteG154146	a	CAPTEscaffold_83	115489-115622	+	Yes	134	Ensembl Metazoa 45	Annelida	PRJNA379706
